# Supplementary material for: A simplified early stage assessment of process intensification: glycidol as a value-added product from epichlorohydrin industry wastes
Source: Royal Society of Chemistry journal article supplement (doi:10.1039/c6gc00882h), 2016-01-01
Supplement: c6gc00882h11.pdf [file c6gc00882h11.pdf]

## Supporting information

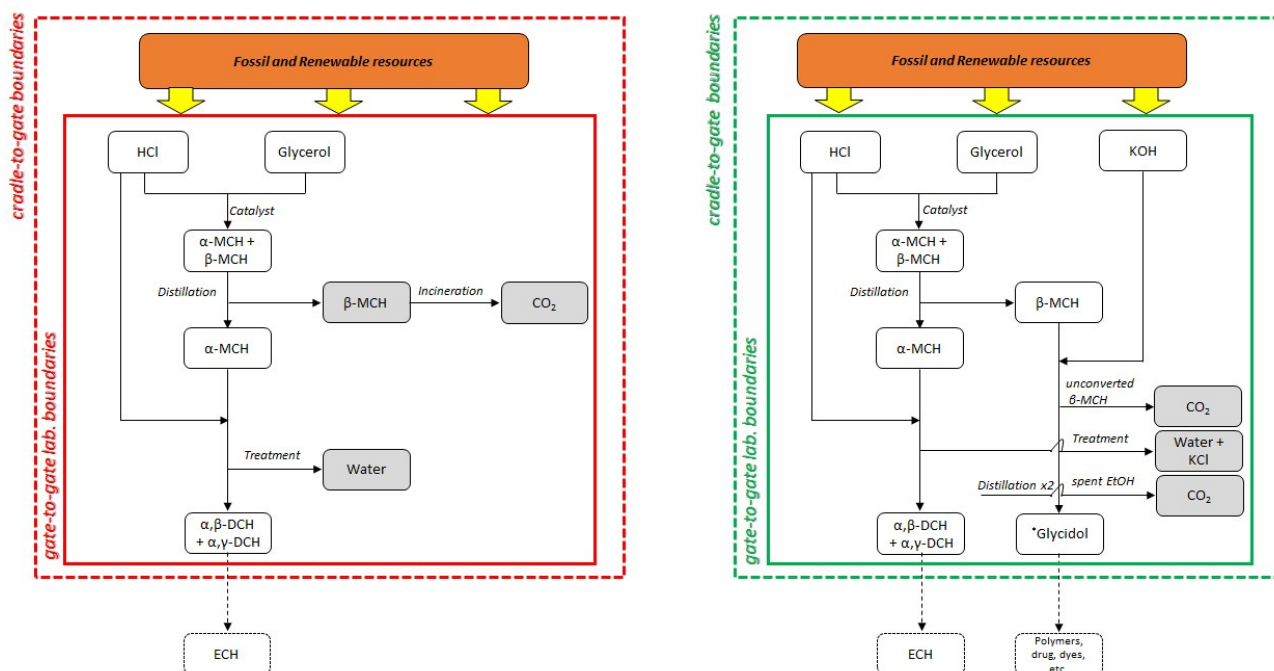

**Fig. S1** System boundaries of the traditional (red) and innovative (green) route to chlorohydrins: i) continuous line represents the gate-to-gate boundaries within the laboratory; ii) the dashed box is the entire production chain from the raw materials extraction up to the synthesis of the valuable product(s) (cradle-to-gate approach).

\*Glycidol production using renewables (glycerol) implies the avoided production from allyl alcohol according to the system boundaries in **Figure S2**.

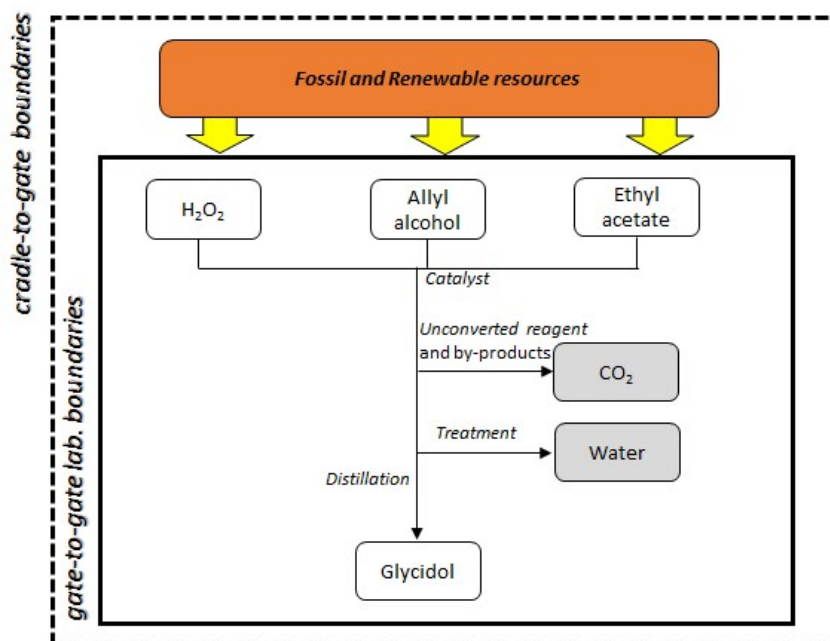

**Fig. S2** System boundaries of the traditional fossil-route from allyl alcohol.

| <u>System input (for the first chlorination)</u>      | <b>Unit</b> | <b>Amount</b>      |                   |
|-------------------------------------------------------|-------------|--------------------|-------------------|
| Glycerol                                              | g           | 150.0              |                   |
| HCl <sub>g</sub>                                      | g           | 119                |                   |
| Acetic acid (catalyst)                                | g           | 7.8                |                   |
| <u>System outputs - products</u>                      |             | <i>Traditional</i> | <i>Innovative</i> |
| α,β-DCH                                               | g           | 188.0              | 188.0             |
| α,γ-DCH                                               | g           | 5.0                | 5.0               |
| Glycidol                                              | g           | -                  | 8.1               |
| <u>System outputs – environmental releases</u>        |             |                    |                   |
| (β-MCH)                                               | g           | (13.5)             | -                 |
| CO <sub>2</sub> from β-MCH incineration               | g           | 16.1               | -                 |
| Water                                                 | g           | 0.2                | 1.6               |
| KCl**                                                 | g           | -                  | 6.0               |
| <u>Distillation procedures</u>                        |             |                    |                   |
| N° of steps                                           |             | 1                  | 3                 |
| Steam***                                              | MJ          | 1.4E-02            | 7.2E-02           |
| Cooling***                                            | MJ          | 1.2E-02            | 6.3E-02           |
| EtOH***                                               | g           | -                  | 6.4               |
| CO <sub>2</sub> from unrecovered EtOH incineration*** | g           | -                  | 18.4              |

\*\*deriving from KOH input (4.5g) used to facilitate the chlorine elimination

\*\*\* evaluated on the basis of the methodology reported in literature.<sup>75</sup>

**Tab. S1** Inventories for both scenarios: traditional and innovative, derived from experimental data.

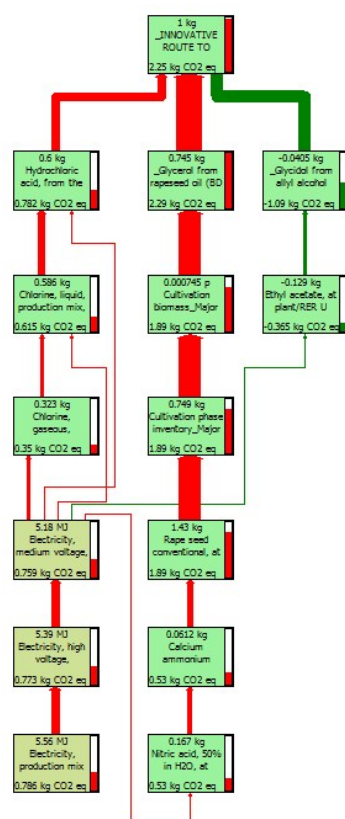

**Fig. S3** SimaPro network tool: negative effect (red arrows) and avoided impacts (green arrows) are depicted to show contribution to the CF index.

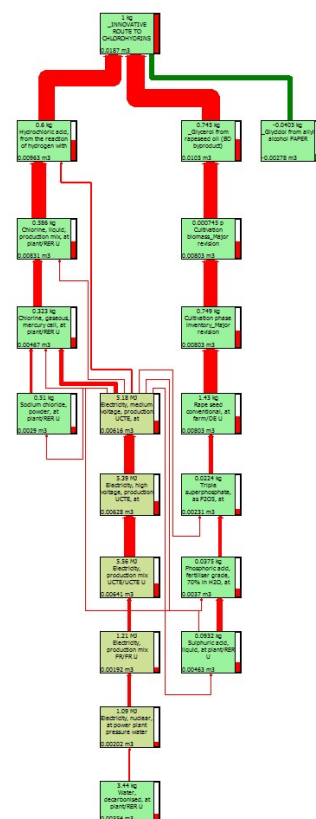

**Fig. S4** SimaPro network tool: negative effect (red arrows) and avoided impacts (green arrows) are depicted to show contribution to the WF index.

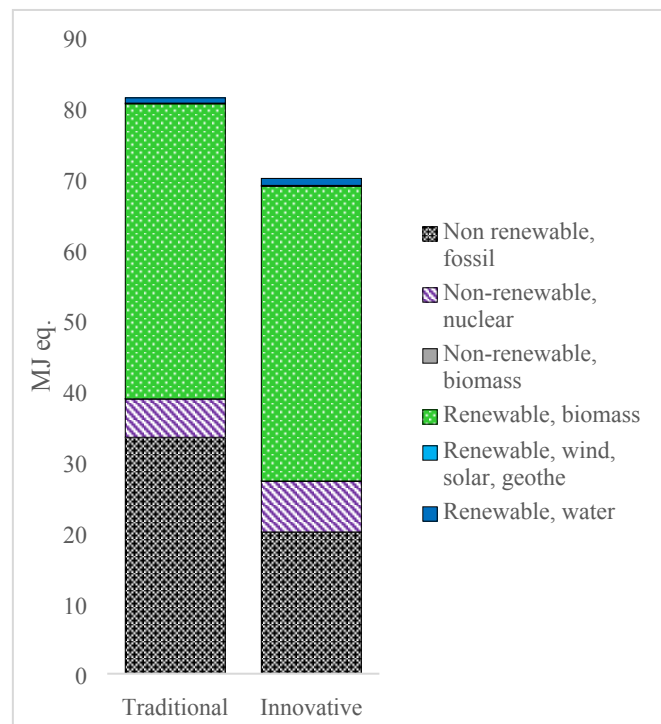

**Fig. S5** Contribution to CED indicator.

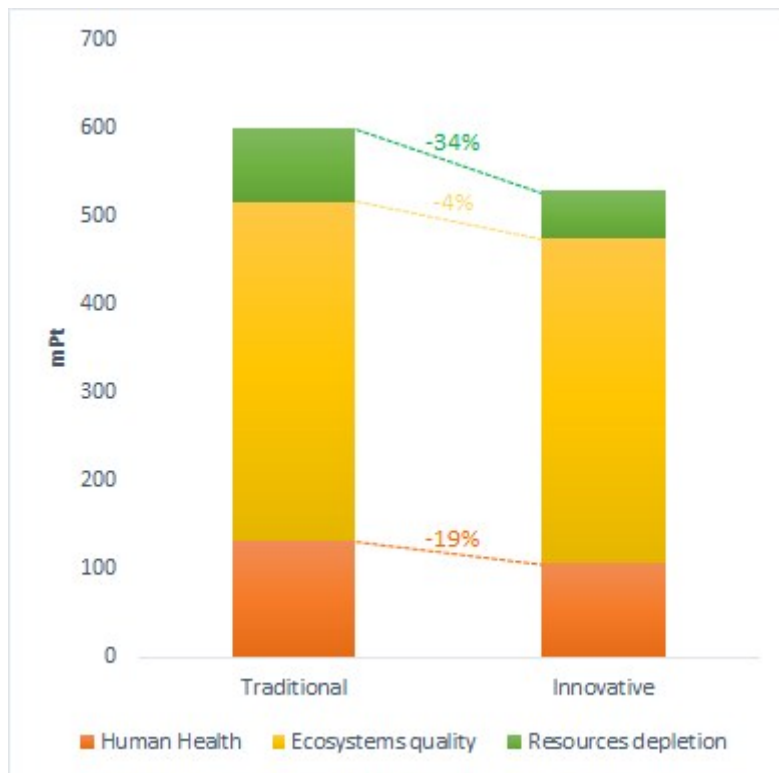

**Fig. S6** Effect of the improvements on the ReCiPe receptors.

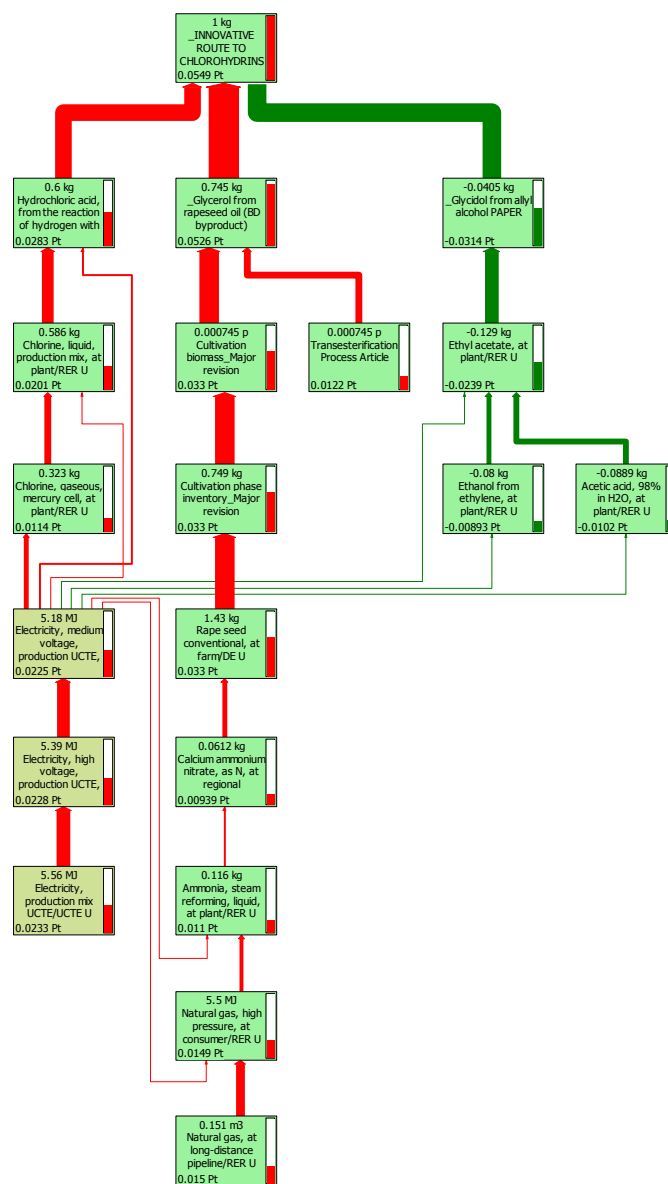

Fig. S7 SimaPro network tool: SS-resources depletion receptor.

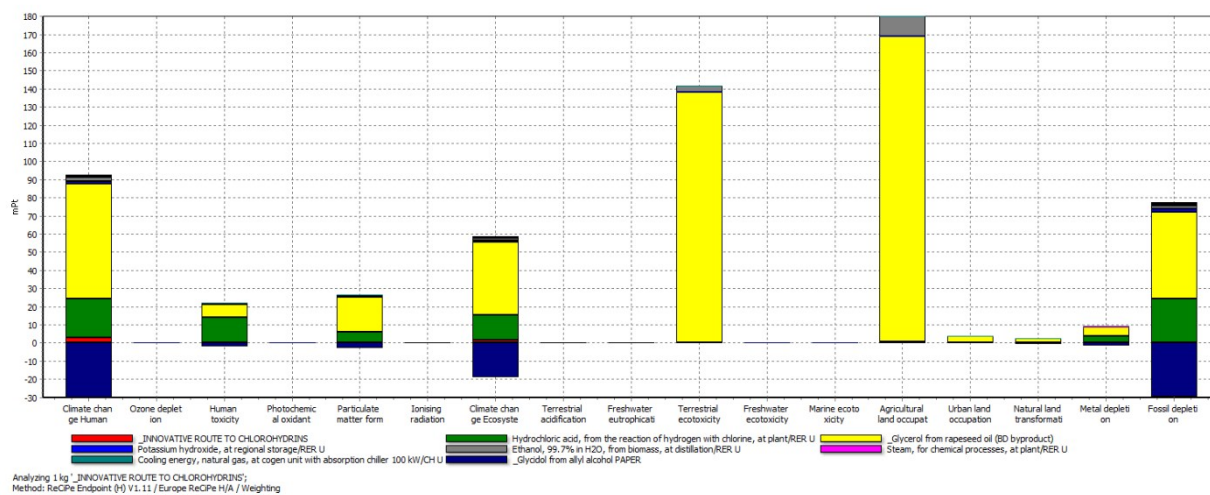

Fig. S8 SimaPro weighting tool: contribution of each category to cumulative SS.

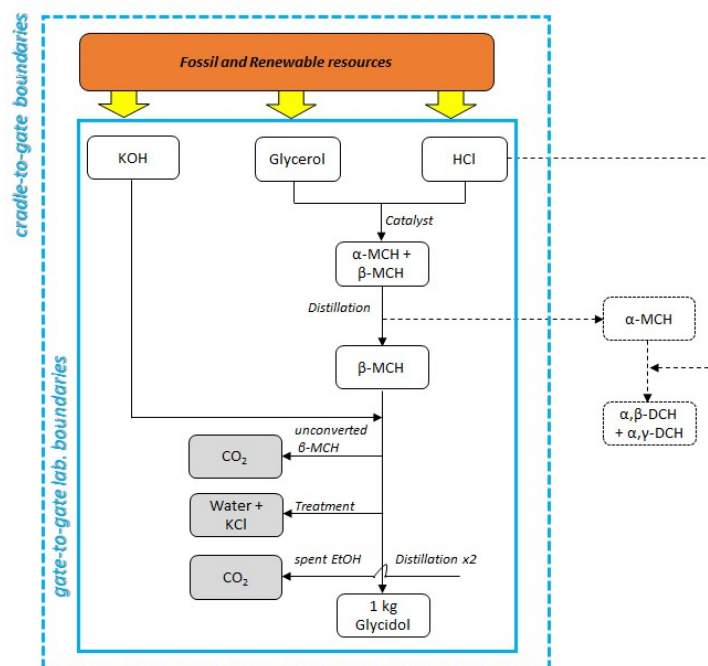

**Fig. S9** System boundaries of the innovative route to produce 1kg of glycidol.

| <i>System input</i>                                         | <b>Unit</b> |     |
|-------------------------------------------------------------|-------------|-----|
| Allyl alcohol                                               | kg          | 1.8 |
| Ethyl acetate                                               | kg          | 3.1 |
| H <sub>2</sub> O <sub>2</sub>                               | kg          | 3.5 |
| (Catalyst)                                                  | kg          | 0.2 |
| Molar yield to glycidol                                     | %           | 43  |
| Selectivity to glycidol                                     | %           | 93  |
| <i>System outputs – environmental releases</i>              |             |     |
| Water                                                       | kg          | 4.3 |
| CO <sub>2</sub> from unconverted allyl alcohol incineration | kg          | 1.0 |
| CO <sub>2</sub> from by-products incineration               | kg          | 0.2 |
| CO <sub>2</sub> from unrecovered ethyl acetate incineration | kg          | 3.1 |
| <i>Distillation procedures</i>                              |             |     |
| N° of steps                                                 |             | 1   |
| Steam***                                                    | MJ          | 2.6 |
| Cooling***                                                  | MJ          | 2.1 |

\*\*\* evaluated on the basis of the methodology reported in literature.<sup>75</sup>

**Tab. S2** Cradle-to-gate inventories and allocation for the innovative route to produce 1kg of glycidol.

| <u>System input</u>                                   | <b>Unit</b> |      |
|-------------------------------------------------------|-------------|------|
| Glycerol                                              | kg          | 18.4 |
| HCl <sub>g</sub>                                      | kg          | 14.6 |
| Acetic acid (catalyst)                                | kg          | 1.0  |
| <u>Co-products (not included in the boundaries)</u>   |             | kg   |
| ( $\alpha,\gamma$ -DCH)                               | kg          | 23.1 |
| ( $\beta,\gamma$ -DCH)                                | kg          | 0.6  |
| <u>System outputs – environmental releases</u>        |             | kg   |
| Water                                                 | kg          | 0.2  |
| KCl****                                               | kg          | 0.7  |
| CO <sub>2</sub> from unrecovered $\beta$ -MCH         | kg          | 0.2  |
| <u>Distillation procedures</u>                        |             |      |
| N° of steps                                           |             | 3    |
| Steam***                                              | MJ          | 8.8  |
| Cooling***                                            | MJ          | 7.7  |
| EtOH***                                               | kg          | 0.8  |
| CO <sub>2</sub> from unrecovered EtOH incineration*** | kg          | 2.3  |
| <u>Allocation to be applied</u>                       | %           | 4    |

\*\*\* evaluated on the basis of the methodology reported in literature.<sup>75</sup>

\*\*\*\* deriving from KOH input (0.6kg) used to facilitate the chlorine elimination.

**Tab. S3** Cradle-to-gate inventories for the traditional route to produce 1kg of glycidol. Based on data reported in literature.<sup>36</sup>

| <b>Performance index</b>           | <i>from allyl alcohol</i> | <i>from glycerol</i> |
|------------------------------------|---------------------------|----------------------|
| <b>CF</b> (kg CO <sub>2</sub> eq.) | 27.0                      | 3.3                  |
| <b>WF</b> (m <sup>3</sup> )        | 7.0E-02                   | 2.0E-02              |
| <b>CED</b> (MJ <sub>eq.</sub> )    | 349.1                     | 83.0                 |
| <b>SS</b> (Pt)                     | 2.1                       | 0.6                  |

**Tab. S4** Cradle-to-gate analysis for the synthesis of 1kg of glycidol: results for the traditional route (from allyl alcohol) and the innovative pathway (from glycerol).
