# Supplementary figures and images for: A simplified early stage assessment of process intensification: glycidol as a value-added product from epichlorohydrin industry wastes
Source: Royal Society of Chemistry journal article supplement (doi:10.1039/c6gc00882h), 2016-01-01

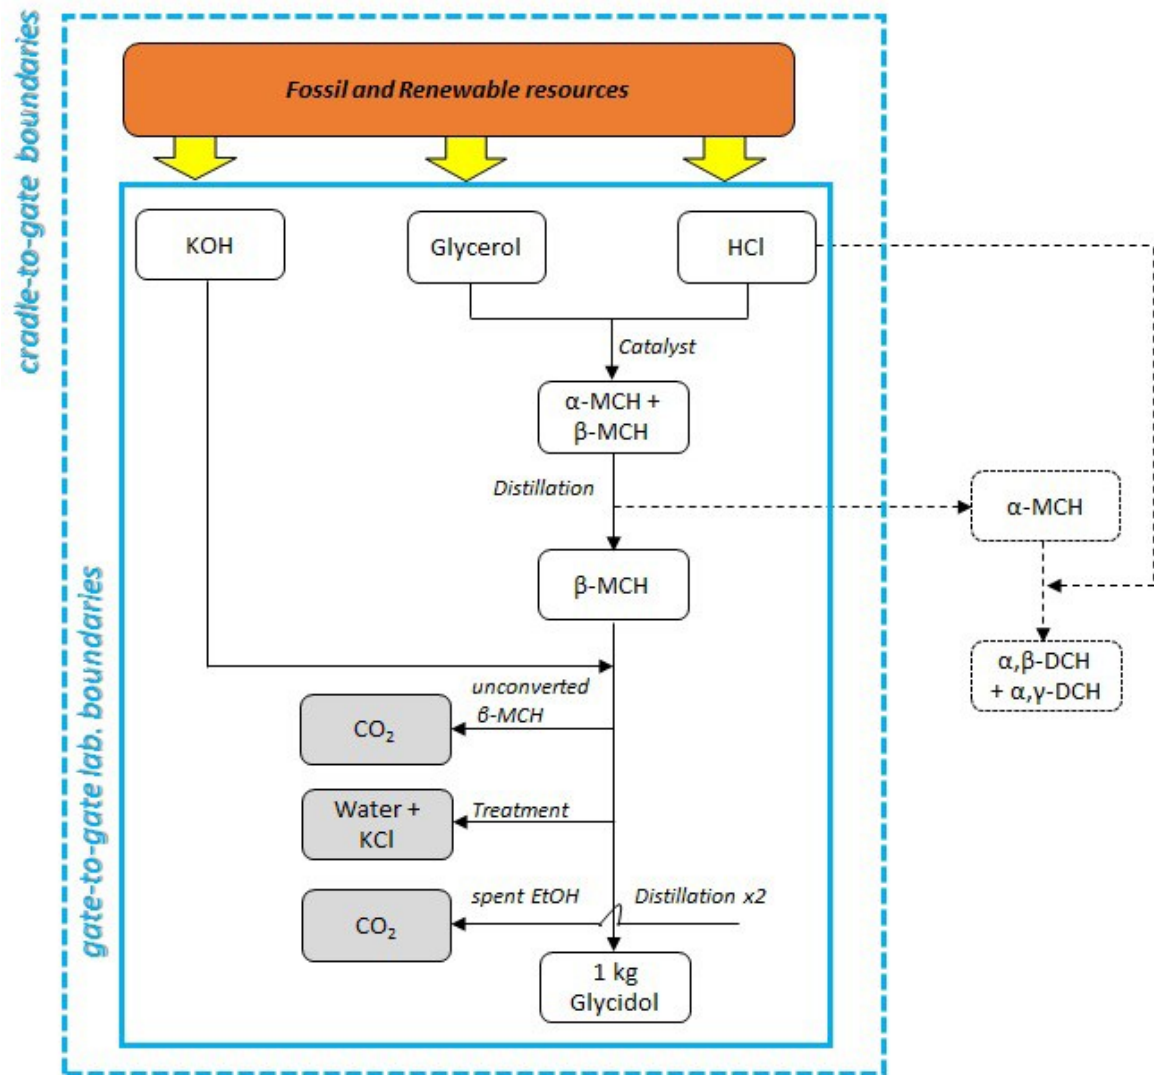

Supplement: c6gc00882h10.pdf [file c6gc00882h10.pdf]

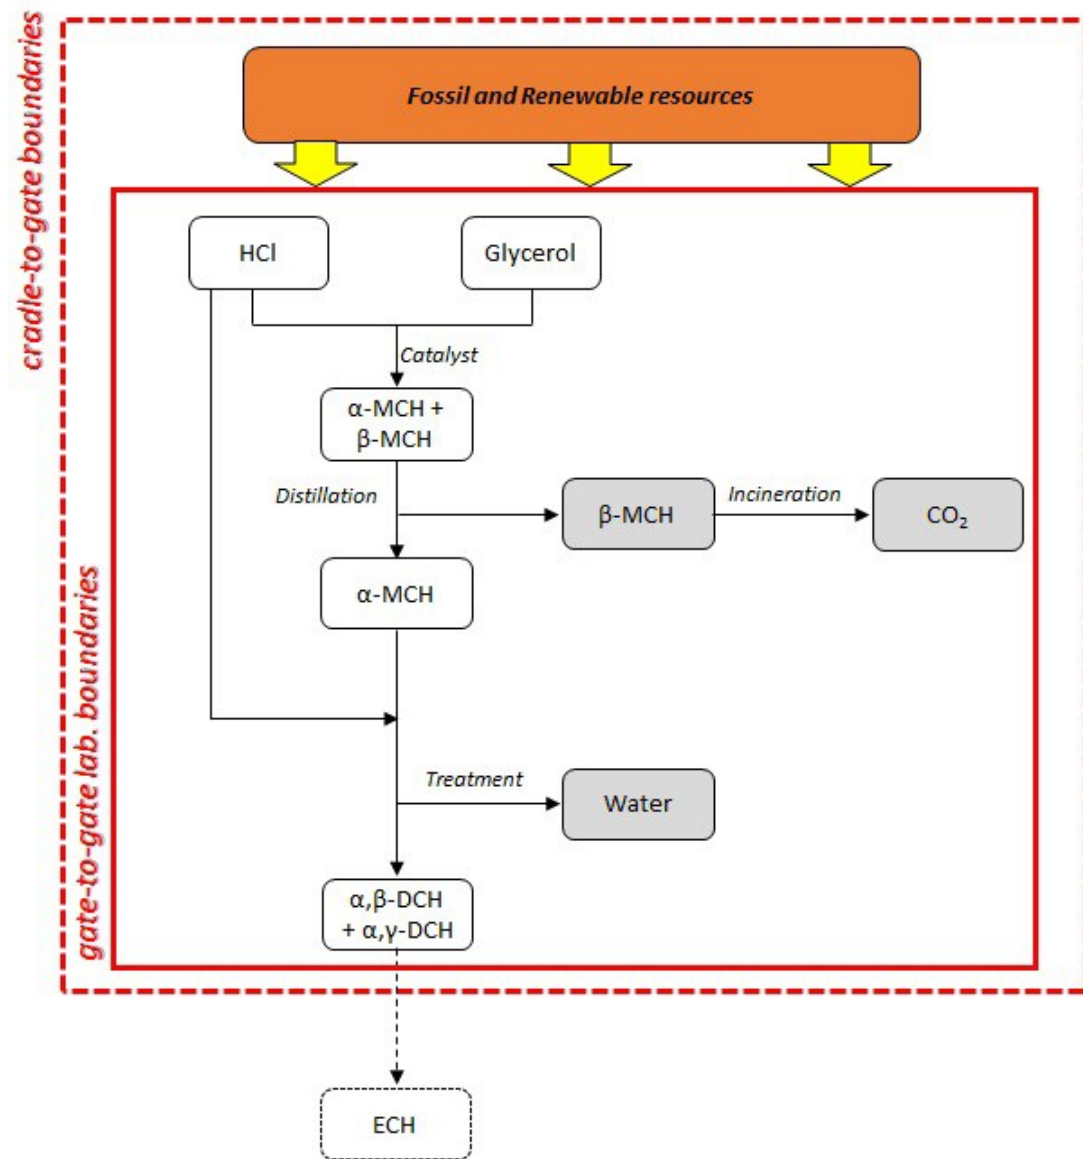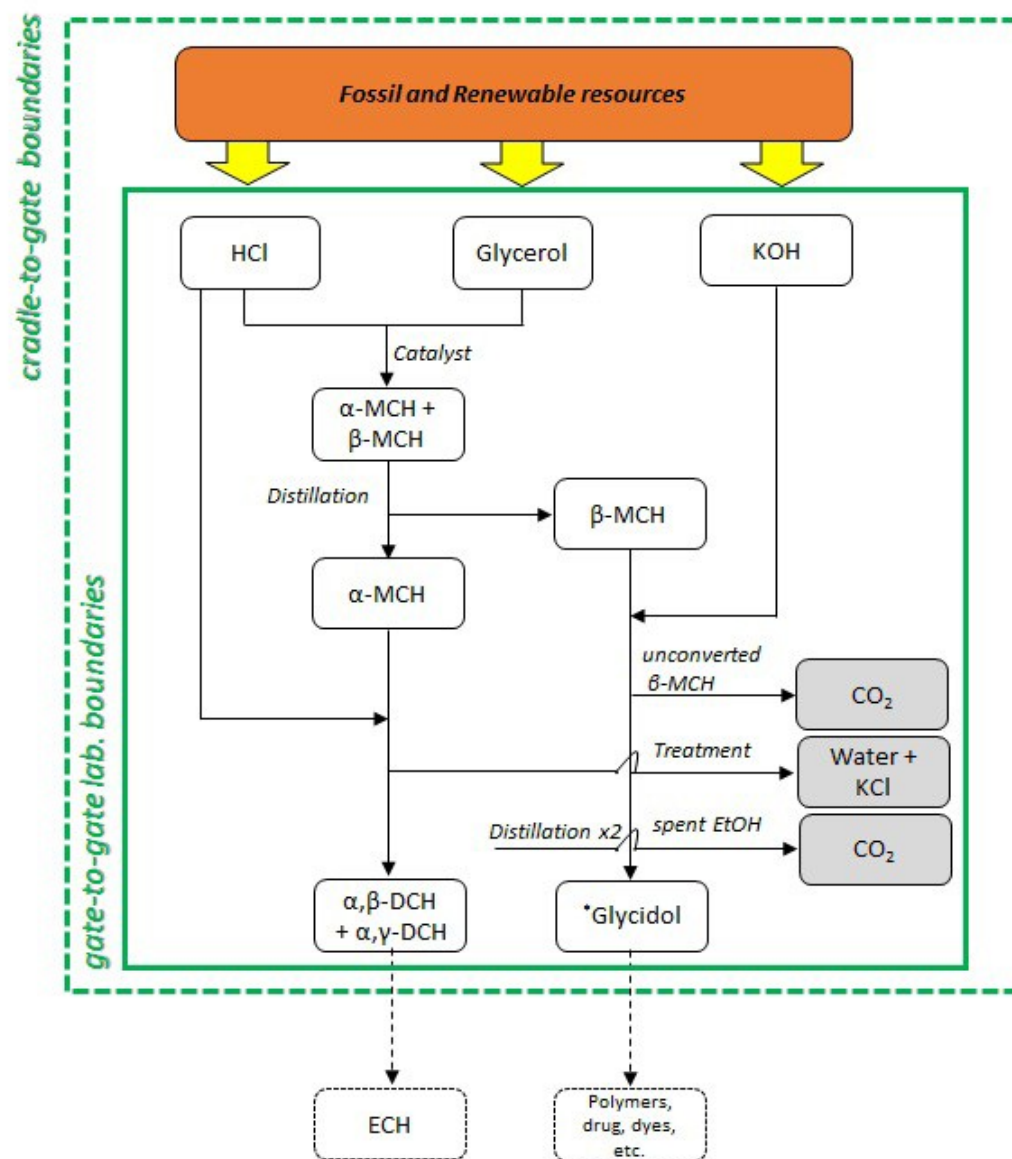

Supplement: c6gc00882h2.pdf [file c6gc00882h2.pdf]

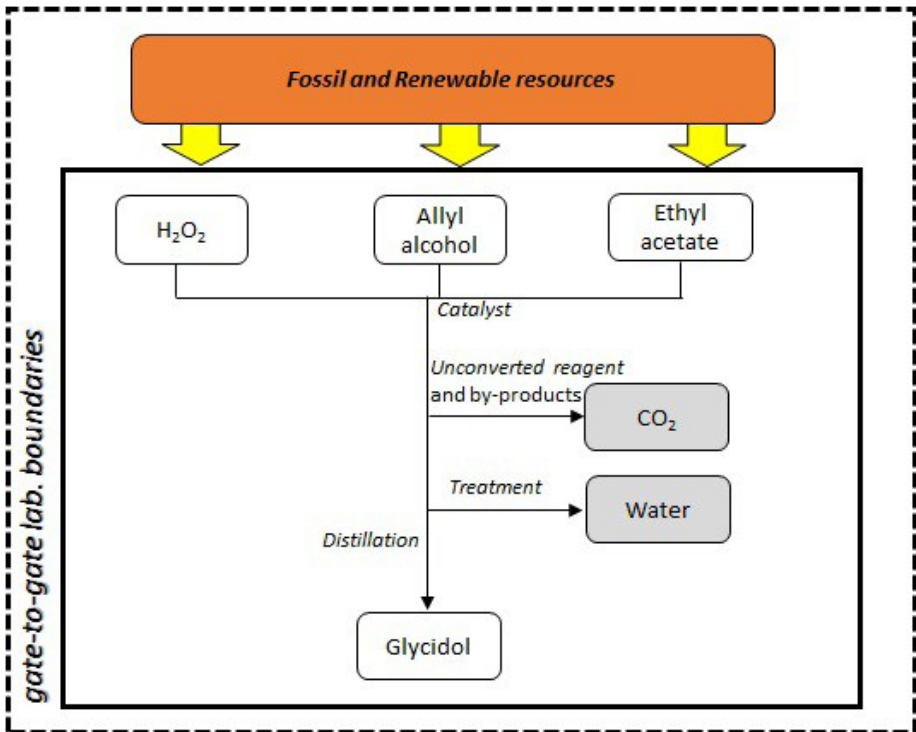

Supplement: c6gc00882h3.pdf [file c6gc00882h3.pdf]

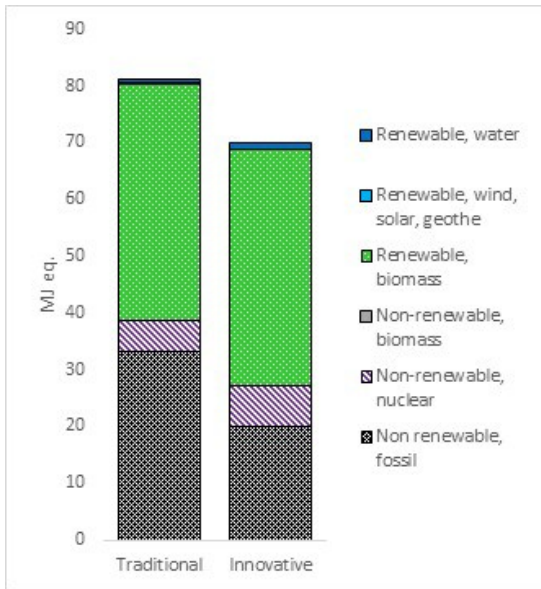

Supplement: c6gc00882h6.pdf [file c6gc00882h6.pdf]

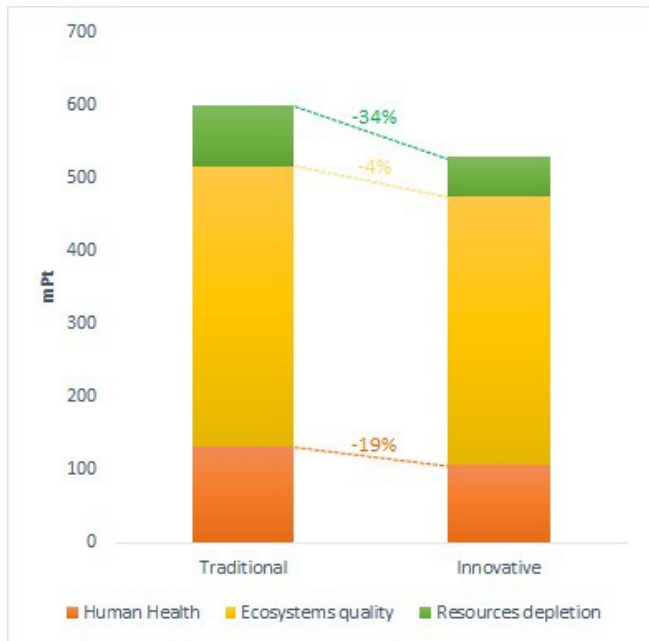

Supplement: c6gc00882h7.pdf [file c6gc00882h7.pdf]

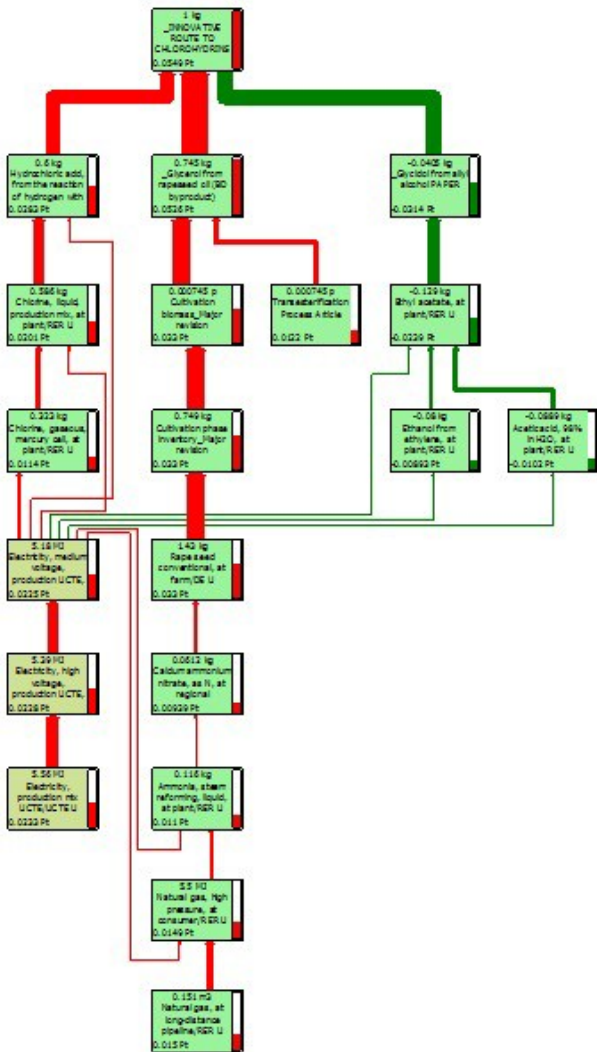

Supplement: c6gc00882h8.pdf [file c6gc00882h8.pdf]
